# Supplementary material for: Network Pharmacology Study and Experimental Validation of Yiqi Huayu Decoction Inducing Ferroptosis in Gastric Cancer
Source: Front Oncol. 2022 Feb 14;12:820059. doi: 10.3389/fonc.2022.820059 (PMC8883049; doi:10.3389/fonc.2022.820059)
Supplement: Supplementary file 17 [file Table_12.xlsx]

## Sheet: 1
data	2021.9.11
time	21:59:43
	96 WELL PLATE
	540
result
		1	2	3	4	5	6	7	8	9	10	11	12
	A	0.081	0.126	0.144	0.122	0.116	0.114	0.122	0.081	0.078	0.094	0.081	0.078	540
	B	0.081	0.093	0.134	0.101	0.092	0.098	0.096	0.081	0.083	0.082	0.081	0.078	540
	C	0.08	0.09	0.103	0.102	0.099	0.119	0.097	0.083	0.083	0.082	0.08	0.079	540
	D	0.081	0.092	0.102	0.098	0.096	0.104	0.098	0.082	0.085	0.083	0.079	0.078	540
	E	0.079	0.091	0.103	0.098	0.091	0.098	0.104	0.088	0.082	0.082	0.081	0.076	540
	F	0.081	0.093	0.103	0.099	0.094	0.096	0.097	0.082	0.086	0.087	0.081	0.078	540
	G	0.081	0.094	0.113	0.103	0.095	0.099	0.098	0.081	0.082	0.084	0.08	0.079	540
	H	0.082	0.093	0.104	0.098	0.092	0.22	0.221	0.081	0.081	0.081	0.081	0.078	540

## Sheet: 2
data	2021.9.19
time	09:10:01
	96 WELL PLATE
	540
result
		1	2	3	4	5	6	7	8	9	10	11	12
	A	0.068	0.138	0.166	0.127	0.122	0.106	0.133	0.066	0.064	0.078	0.065	0.063	540
	B	0.067	0.088	0.121	0.095	0.086	0.089	0.089	0.067	0.069	0.068	0.067	0.064	540
	C	0.065	0.085	0.087	0.094	0.096	0.114	0.092	0.068	0.068	0.068	0.065	0.064	540
	D	0.066	0.085	0.085	0.087	0.089	0.099	0.092	0.067	0.071	0.067	0.064	0.062	540
	E	0.064	0.085	0.087	0.089	0.087	0.091	0.1	0.073	0.067	0.068	0.066	0.061	540
	F	0.066	0.085	0.087	0.09	0.088	0.089	0.091	0.067	0.071	0.073	0.066	0.063	540
	G	0.066	0.091	0.1	0.096	0.093	0.095	0.093	0.065	0.067	0.07	0.065	0.065	540
	H	0.067	0.086	0.087	0.089	0.087	0.21	0.208	0.065	0.066	0.065	0.065	0.063	540

## Sheet: 3
data	2021.9.17
time	22:32:43
	96 WELL PLATE
	540
result
		1	2	3	4	5	6	7	8	9	10	11	12
	A	0.084	0.358	0.335	0.396	0.099	0.116	0.307	0.085	0.089	0.087	0.086	0.087	540
	B	0.087	0.096	0.096	0.107	0.1	0.098	0.106	0.09	0.089	0.089	0.089	0.086	540
	C	0.084	0.096	0.095	0.099	0.099	0.101	0.121	0.091	0.089	0.086	0.083	0.088	540
	D	0.085	0.093	0.096	0.096	0.098	0.101	0.189	0.084	0.087	0.085	0.084	0.085	540
	E	0.085	0.092	0.098	0.098	0.113	0.096	0.101	0.087	0.086	0.086	0.083	0.088	540
	F	0.087	0.092	0.094	0.098	0.105	0.103	0.186	0.087	0.089	0.088	0.086	0.085	540
	G	0.086	0.091	0.094	0.098	0.114	0.105	0.228	0.087	0.085	0.084	0.082	0.084	540
	H	0.085	0.086	0.089	0.089	0.084	0.082	0.085	0.085	0.088	0.085	0.09	0.085	540
