# Supplementary material for: Network Pharmacology Study and Experimental Validation of Yiqi Huayu Decoction Inducing Ferroptosis in Gastric Cancer
Source: Front Oncol. 2022 Feb 14;12:820059. doi: 10.3389/fonc.2022.820059 (PMC8883049; doi:10.3389/fonc.2022.820059)
Supplement: Supplementary file 19 [file Table_14.xlsx]

## Sheet: all targets in YQHY
Compound	Target
CP01	PPARA
	CNR2
	ACHE
	FAAH
	TRPV1
	AR
	CYP19A1
	ESR1
	CHRM2
	SLC6A2
	SLC6A4
	CYP2C19
	BCHE
	PTPN1
	NR1I3
	SLC5A7
	PTGS1
	NR1H3
	RORC
	SREBF2
	NPC1L1
	ESR2
	CTSD
	SHBG
	CYP17A1
	HMGCR
	CYP51A1
	PTPN2
	SRD5A1
	SRD5A2
	NR3C2
	NR3C1
	PGR
	SERPINA6
	SIGMAR1
	NR1I2
	HSD17B3
	FABP1
	RBP4
	PTPN6
	SQLE
	UGT2B7
	FABP4
	CNR1
	PPARG
	TERT
	FABP3
	FABP5
	PPARD
	LSS
	CES1
	SCD
	CES2
	PREP
	PTGES
	TRPA1
	TOP1
	RORA
	POLB
	CCR5
	PDE4D
	PTPRF
	HSD11B1
	PLA2G1B
	CDC25B
	ACP1
	G6PD
	AKR1B10
	PTGER2
	FNTA FNTB
	PTGER1
	FFAR1
	CD81
	ALOX5
	SLC6A3
	ADORA3
	MAPK3
	PRKCH
	HSD11B2
	CDC25A
	PTPN11
	ADORA1
	ADORA2A
	SPHK2
	PLA2G4A
	SPHK1
	HTR2B
	RXRB
	ADRA2B
	RARG
	RXRG
	RARB
	RARA
	RXRA
	MAPK14
	RORB
	MAPK1
	NR1H2
	NOS2
	BACE1
CP02	CNR1
	CNR2
	SHH
	SLC6A3
	ADRA2A
	ADRA2C
	ADRA2B
	ESR1
	CHRM2
	CHRM1
	SLC6A2
	HTR2C
	SLC6A4
	PTGS2
	TACR2
	CHRM3
	ADRB3
	ADORA3
	SHBG
	UGT2B7
	ACHE
	HTR2A
	MAOA
	KDM1A
	S1PR5
	SPHK2
	S1PR4
	S1PR3
	S1PR1
	THRB
	AR
	IGF1R
	CES1
	KIF11
	FAAH
	ESR2
	POLB
	PTGFR
	PTGS1
	NR1H3
	NR1H2
	HSD17B3
	KCNH2
	SIGMAR1
	AHR
	CYP1A2
	THRA
	PGR
	HSD11B1
	SLC18A2
	TYR
	ALOX5
	CES2
	DUSP3
	CDC25A
	CYP19A1
	ALOX15
	TTR
	ALOX12
	LTB4R
	PTGER2
	HRH1
	PTGER3
	PTGER1
	CXCR3
	RCOR1 KDM1A
	TAAR1
	CHRNA4 CHRNB2
	RARB
	RARA
	S1PR2
	ACACB
	MAOB
	OPRL1
	SRC
	KDR
	HDAC1
	ALK
	HMGCR
	HTR2B
	GPR55
	GPR18
	ENPP2
	HAO1
	TRPV1
	HTR6
	MIF
	SLC13A5
	SRD5A2
	SLC5A2
	IDO1
	FYN
	TYMS
	PTK2
	ALOX5AP
	DRD2
	FDFT1
	CXCL8
	SLC22A6
	PLG
CP03	F2
	PLAU
	CES1
	CES2
	MIF
	CYP11B2
	CTSG
	TBXAS1
	SLC6A2
	ACHE
	ADRA2A
	ADRA2C
	HPGDS
	CTSC
	CTSK
	CTSS
	CTSV
	CTSL
	CTSB
	LRRK2
	NAAA
	KLKB1
	ALDH3A1
	CTSH
	CTSF
	MGLL
	CYP11B1
	GRM5
	CA12
	CA9
	TNKS2
	HSD11B1
	CA1
	GSK3B
	CYP19A1
	JAK3
	JAK2
	CCNE2 CDK2 CCNE1
	CXCR2
	FKBP1A
	RGS4
	ADORA1
	MPO
	ADORA2A
	ADORA2B
	MAPK10
	TLR4
	HTR6
	TLR9
	CA7
	NOTUM
	GRM4
	MMP2
	HTR2B
	ADRA2B
	DRD1
	CHRM1
	HTR2A
	TACR2
	DRD3
	OPRD1
	ADRB3
	ADORA3
	CYP2D6
	CYP2C9
	CYP3A4
	CYP2C19
	TRPA1
	ACE
	EGFR
	PDE10A
	GABRB3 GABRG2 GABRA5
	IDO1
	PREP
	SLC6A3
	CTRB1
	PABPC1
	BCHE
	PIK3CD PIK3R1
	GALR3
	ALDH1A1
	TSPO
	GABRA2 GABRB2 GABRG2
	METAP1
	HMOX1
	HTT
	PGR
	GABRB3 GABRA3 GABRG2
	GABRB3 GABRG2 GABRA1
	GABRA2 GABRB3 GABRG2
	PSMB1
	CHRM5
	CHRM2
	CNR1
	GCK
	PSEN2 PSENEN NCSTN APH1A PSEN1 APH1B
	GRM2
	GPR55
	CA2
	NQO2
CP04	PPARA
	CNR2
	FAAH
	TRPV1
	AR
	CYP19A1
	ESR1
	CHRM2
	SLC6A2
	SLC6A4
	CYP2C19
	NR1I3
	UGT2B7
	ACHE
	BCHE
	PTPN1
	CXCR3
	RORC
	SREBF2
	NPC1L1
	ESR2
	CTSD
	NR1H3
	SHBG
	CYP17A1
	HMGCR
	CYP51A1
	PGR
	PTPN2
	SRD5A1
	SRD5A2
	NR3C2
	NR3C1
	SERPINA6
	SIGMAR1
	NR1I2
	HSD17B3
	FABP1
	MAOB
	PTGS1
	SQLE
	FABP4
	PPARG
	TERT
	FABP3
	FABP5
	PPARD
	CNR1
	CCR5
	LSS
	CES1
	SCD
	TOP1
	RBP4
	PTPN6
	PTGES
	RORA
	TRPA1
	G6PD
	PTGS2
	CDC25A
	CDC25B
	FNTA FNTB
	PTGER1
	PTGER2
	CES2
	PREP
	FFAR1
	SLC6A3
	ADORA3
	MAPK3
	ADORA1
	ADORA2A
	SPHK2
	PLA2G4A
	SPHK1
	ATP12A
	NR1H2
	POLB
CP05	AR
	HMGCR
	CYP51A1
	NPC1L1
	NR1H3
	CYP19A1
	CYP17A1
	RORC
	ESR1
	ESR2
	SREBF2
	SHBG
	SLC6A2
	CYP2C19
	RORA
	PTPN1
	BCHE
	SERPINA6
	SLC6A4
	CHRM2
	VDR
	ACHE
	G6PD
	NR1H2
	GLRA1
	CES2
	PTGER1
	PTGER2
	HSD11B1
	PTGES
	CDC25A
	PPARA
	PPARD
	DHCR7
	SQLE
	PTPN6
	NR1I3
	FDFT1
	SIGMAR1
	NOS2
	NR3C1
	PPARG
	CDC25B
	UGT2B7
	HSD11B2
	POLB
	PREP
	PTGER4
	IDO1
	DRD2
	TBXAS1
	ATP12A
	MDM4
	MDM2
	PTGIR
	DHCR7 EBP
	FABP4
	TERT
	FABP3
	FABP5
	FABP1
	ADORA3
	MAPK3
	PTPN11
	AKR1B10
	PRKCG
	PRKCD
	PRKCB
	PRKCE
	PRKCQ
	PTPRF
	PLA2G1B
	ACP1
	IGF1R
	SRC
	KDR
	ALK
	SCD
	MGLL
	BACE1
	CCR1
	TOP2A
	GABBR1
	BACE2
	MAPK14
	F11
	PTGFR
	PTGER3
	PTGDR
	TOP1
	HIF1A
	ACACB
	PRKCH
	PTPN2
	TACR1
	MTNR1A
	MTNR1B
	NPY5R
	SLC22A6
	MAP3K14
CP06	CYP19A1
	CA7
	ABCC1
	HSD17B1
	CA12
	SHBG
	CA4
	CYP1B1
	CBR1
	ESR1
	ESR2
	PTGS1
	MAOB
	ADORA1
	ADORA3
	ABCG2
	TAS2R31
	AKR1C3
	PLA2G1B
	GRM5
	CES1
	PPARG
	CES2
	MMP12
	SLC5A2
	POLB
	MMP13
	PLA2G2A
	PLA2G5
	PLA2G10
	BACE1
	SERPINE1
	KLK1
	KLK2
	RXRA
	CHRNA7
	SRC
	CA2
	CA1
	CA3
	CA6
	CA13
	CA5B
	CA5A
	KIT
	KDR
	FGFR1
	MET
	NQO2
	HSD17B14
	AKR1B1
	BCHE
	NOX4
	CA9
	IGF1R
	INSR
	CLK1
	DYRK1B
	CDK5R1 CDK5
	ESRRA
	ESRRB
	HSD17B2
	EDNRA
	DYRK1A
	SIRT2
	IGFBP3
	PTGER1
	PTGER4
	PTGER2
	PTGER3
	PIK3CB
	CYP2C9
	CYP3A4
	PIK3CA
	BCL2L1
	F3
	ADCY5
	PGF
	VEGFA
	MMP2
	YWHAG
	CTSL
	ALOX12
	MMP3
	APP
	BCL2
	VCP
	LCK
	SYK
	WEE1
	HNF4A
	CDK4
	CCNE1 CDK2
	CCNE1 CDK3
	AURKA
	SNCA
	ERN1
	MAOA
	MMP9
	CDK1 CCNB1
CP07	CA7
	CA12
	CA4
	CYP1B1
	ADORA3
	CYP19A1
	ABCG2
	HSD17B1
	ADORA1
	ESR2
	ESR1
	TAS2R31
	ABCC1
	MAOB
	SHBG
	CBR1
	MMP13
	MMP12
	PTGS1
	CA2
	BACE1
	AKR1C3
	PLA2G1B
	KLK1
	KLK2
	SRC
	CA3
	CA1
	PPARG
	CA6
	CA5A
	ABCB1
	CHRNA7
	BCHE
	KDR
	POLB
	SERPINE1
	PLA2G5
	PLA2G10
	APP
	TERT
	CES1
	ACHE
	KIT
	NOX4
	PLG
	CES2
	MET
	CA13
	CA5B
	CA9
	EZR
	RXRA
	AKR1B1
	GRM2
	GUSB
	FGFR1
	ALPG
	MMP2
	TOP1
	MMP9
	MMP14
	SLC5A2
	IGF1R
	PIM1
	LCK
	PIM2
	PIM3
	DNMT1
	ST3GAL3
	FUT7
	FUT4
	STAT1
	PDPK1
	GRM5
	MPI
	FFAR1
	RET
	DUSP3
	HSD17B2
	CDK1 CCNB1
	CCNE1 CDK2
	NTRK1
	AURKA
	DYRK1A
	PTPN1
	ODC1
	EDNRA
	PARP1
	ADCY5
	TNKS2
	TNKS
	CDK2 CCNA1 CCNA2
	ALPL
	BCL2
	GSK3B
	MMP3
	DNM1
	ERN1
	MMP8
CP08	GABRB3 GABRA3 GABRG2
	GABRB3 GABRG2 GABRA1
	GABRB3 GABRG2 GABRA5
	GABRA2 GABRB3 GABRG2
	PTGS2
	TTR
	FNTA FNTB
	F2
	PLAU
	CTRB1
	NCEH1
	GABRG2 GABRB3 GABRA6
	GABRB3 GABRA4 GABRG2
	IDH1
	CES1
	CES2
	ADORA3
	GRM5
	CTSL
	MGLL
	PSMB5
	TSPO
	CHRM4
	CHRM2
	CHRM1
	CHRM3
	EGFR
	ADORA1
	ADORA2A
	HSD11B1
	C1R
	ACHE
	LIPE
	FKBP1A
	CRHR1
	ADORA2B
	TMIGD3
	CDK1
	CACNA1C
	PIM1
	MMP2
	KAT2B
	CDK5R1 CDK5
	GCK
	KCNJ5 KCNJ3
	KCNJ6 KCNJ3
	BRD9
	PDE5A
	RAF1
	CXCR2
	MAPK14
	PLA2G2A
	GPBAR1
	TRPA1
	ECE1
	MAPT
	CASP3
	APP
	GRM4
	PREP
	IDO1
	SNCA
	STAT3
	PRKCD
	PRKCA
	HSD17B2
	GRM2
	VCP
	MEN1
	PDE4D
	HTR6
	ABCG2
	F2R
	TYMS
	METAP1
	PSMB1
	TLR9
	DGAT1
	CCNB3 CDK1 CCNB1 CCNB2
	PDE7A
	HSD17B1
	GPR55
	DHODH
	MMP13
	MMP9
	MMP14
	AURKA
	ABL1
	ADRA2A
	ADRA2C
	AVPR2
	CTSS
	PABPC1
	LRRK2
	FAAH
	MAPK8
	MPI
	KCNN4
	SMO
	PHOSPHO1
CP09	GLI2
	GLI1
	CYP19A1
	MTNR1A
	MTNR1B
	NQO2
	HSD11B1
	GRM1
	PTPN2
	ALOX5
	ALDH1A1
	DBF4 CDC7
	P2RX7
	SPHK2
	HRH1
	PTAFR
	HLCS
	CCR2
	MAOB
	EPHX2
	OPRD1
	OPRK1
	CENPE
	PIM1
	PTGS2
	PIM2
	PIM3
	CHRM2
	CYP2C19
	EPHX1
	MAOA
	KDR
	PARP1
	TEK
	PLK1
	BRD4
	PSMB5
	G6PD
	CYP11B1
	CYP11B2
	CXCR3
	ICMT
	HPGD
	FNTA FNTB
	NAAA
	ASAH1
	EPHB4
	BCHE
	CHRM1
	C5AR1
	CHRM3
	CTSK
	CYP24A1
	CYP27A1
	ADH1A
	ADH1B
	ADH1C
	HSP90AA1
	AVPR2
	CHRM5
	CA7
	MMP13
	MMP1
	MMP8
	CA2
	ACHE
	CA1
	ROCK2
	PARP2
	HTR2C
	TUBB3
	JAK2
	ABCB1
	ABL1
	YES1
	LCK
	SRC
	HDAC8
	KCNA5
	SLC6A15
	AKT1
	KCNH2
	ABCG2
	TRPM8
	CHRNA4 CHRNB2
	DRD1
	CHRNA7
	THRB
	DRD2
	DUSP3
	ICAM1
	CDC25A
	SELE
	HSD17B2
	EGFR
	GRM5
	CTSL
	CTSB
	ALDH2
	PGGT1B FNTA
CP10	ABCG2
	AKR1B1
	CYP1B1
	OPRD1
	KIT
	OPRM1
	NOX4
	CA2
	ALOX5
	NOS2
	PTGS2
	ADORA1
	ADORA2A
	ADORA3
	CA12
	CA7
	PLK1
	TERT
	APP
	MET
	ABCC1
	PFKFB3
	CA1
	EGFR
	SYK
	SRC
	FLT3
	KDR
	PLG
	CA4
	CDK1
	MMP13
	PARP1
	ACHE
	GSK3B
	CAMK2B
	PIK3CG
	INSR
	AURKB
	ABCB1
	PTK2
	XDH
	NEK2
	ALK
	BACE1
	PIM1
	TOP2A
	F2
	GLO1
	CA3
	PKN1
	CSNK2A1
	NEK6
	APEX1
	AKR1C2
	AKR1C1
	AKR1C4
	AKR1A1
	DRD4
	PTPRS
	MCL1
	CA9
	CDK2
	MMP2
	CDK5R1 CDK5
	TOP1
	ARG1
	CA6
	CA13
	MMP9
	IGF1R
	CCNB3 CDK1 CCNB1 CCNB2
	CYP19A1
	MAOA
	AXL
	CYP1A1
	AKT1
	CYP1A2
	MMP3
	HSD17B2
	ESR2
	GPR35
	AVPR2
	AMY1A
	GRK6
	TYR
	AHR
	TNKS
	PLA2G2A
	CA14
	IKBKB
	PYGL
	MMP12
	AKR1C3
	PDGFRB
	RET
	TUBB1
	MYLK
	MPG
	MAPT
BX01	PPARG
	PPARA
	PPARD
	FFAR1
	FABP4
	FABP3
	PTGS1
	SCD
	FABP5
	FAAH
	TERT
	FABP1
	CNR1
	PTPN1
	PTPN2
	ALOX5
	POLB
	PTGES
	ESR2
	LTB4R
	PTPN6
	HMGCR
	CDC25A
	HSD11B1
	PTGER2
	TOP1
	PDE4D
	CDC25B
	SRD5A2
	RORC
	PTGS2
	ALOX12
	SLC22A12
	NOS2
	PGR
	PTGER1
	RXRB
	CYP19A1
	PTGIR
	PLA2G1B
	PTGDR2
	HSD11B2
	PTGER4
	NR3C1
	ADORA3
	TRPV1
	CD81
	PRKCH
	ESR1
	FNTA FNTB
	SERPINA6
	SHBG
	G6PD
	CYP51A1
	NR1H3
	PTPRF
	AR
	CYP26B1
	CYP26A1
	SLC16A1
	PTPN11
	ACP1
	NPC1L1
	CYP17A1
	NR3C2
	PREP
	IL6
	GLUL
	HTR2B
	ADRA2B
	MAPK14
	MAPK1
	PLA2G4A
	EDNRA
	FFAR4
	MDM2
	MAPK3
	CES2
	TRPM8
	PSEN2 PSENEN NCSTN APH1A PSEN1 APH1B
	AKR1B10
	CMA1
	CTSG
	GRM2
	HNF4A
	ENPP2
	GPBAR1
	OXER1
	PDE4A
	BCHE
	RBP4
	IMPDH2
	PTGDR
	METAP1
	MMP2
	TOP2A
	PTGES2
	PRKAG1 PRKAB1 PRKAA2
	PDE4B
	ITGAL ICAM1 ITGB2
BX02	PPARG
	PPARA
	PPARD
	FABP4
	FABP3
	FABP5
	FAAH
	TERT
	FABP1
	SCD
	FFAR1
	PTPN1
	PTPN2
	PTGS1
	PTGES
	PTPN6
	CES2
	PREP
	RORC
	AKR1B10
	LTB4R
	HSD11B1
	POLB
	ALOX5
	CYP19A1
	PTGS2
	CNR1
	HMGCR
	PDE4D
	PTPRF
	NR1H3
	PTGER2
	PLA2G1B
	PTGIR
	CDC25A
	CD81
	PRKCH
	TOP1
	CDC25B
	SERPINA6
	SHBG
	G6PD
	CYP51A1
	PTPN11
	FNTA FNTB
	ACP1
	ADORA3
	ESR2
	TRPV1
	NPC1L1
	SIGMAR1
	CYP17A1
	AR
	HSD11B2
	NR3C1
	SRD5A2
	PTGER1
	SLC6A3
	MAPK3
	PGR
	PTGER4
	BCHE
	NR1I3
	FFAR4
	NOS2
	TOP2A
	ESR1
	NR3C2
	RORA
	CHRM2
	ACHE
	SLC6A2
	SLC6A4
	CYP2C19
	BACE1
	NR1H4
	CYP26B1
	CYP26A1
	HNF4A
	SLC16A1
	FABP2
	IDO1
	ALOX12
	FDFT1
	CMA1
	CTSG
	PTGER3
	PTGDR2
	PSEN2 PSENEN NCSTN APH1A PSEN1 APH1B
	ENPP2
	STS
	SQLE
	KEAP1
	THRA
	PDGFRB
	THRB
	ITGAL ICAM1 ITGB2
	KDR
	FGFR1
	METAP1
BX03	SRD5A1
	SRD5A2
	CYP19A1
	SERPINA6
	SHBG
	FABP1
	CYP17A1
	NR3C1
	PGR
	NR1I3
	AR
	NR3C2
	NR1I2
	SIGMAR1
	HSD17B3
	NPC1L1
	ADORA3
	MAPK3
	CCR5
	PTGS1
	CTSD
	TRPA1
	HSD11B1
	PTPN11
	AKR1B10
	PTPN1
	PTPN2
	BACE1
	NOS2
	PTGES
	SLC6A3
	CDC25A
	FAAH
	PRKCH
	ESR1
	ESR2
	TRPV1
	HSD11B2
	CES1
	ALOX5
	FNTA FNTB
	RORA
	BCHE
	PTPN6
	IDO1
	HMGCR
	CYP51A1
	CTSK
	POLB
	CYP2C9
	NPY5R
	HSD17B7
	CES2
	EPHX2
	CXCR3
	TBXA2R
	DRD2
	CCR2
	TNF
	FABP4
	FABP3
	FABP5
	PPARD
	SCN9A
	GPR88
	CETP
	CNR1
	MTNR1A
	MTNR1B
	KIF11
	OXTR
	SLC6A4
	TACR1
	REN
	PARP1
	G6PD
	MDM2
	ICMT
	AVPR2
	AVPR1A
	EPHX1
	PGGT1B FNTA
	GRM5
	PTPRF
	PLA2G1B
	ACP1
	FLT1
	PDGFRB
	RET
	ALOX5AP
	KIT
	HTR2A
	HTR2C
	MAPK10
	HTR7
	MAPK9
	CRHR1
	KCNH2
	CCR1
	GRM1
BX04	PTGS2
	FAAH
	HSD11B1
	FABP4
	FABP3
	FABP5
	PPARD
	FABP1
	NR1H3
	CES2
	PTPN1
	PPARG
	PTGER2
	SCD
	PTGES
	PPARA
	TERT
	CYP19A1
	PTPN6
	PTPN2
	NOS2
	PTPRF
	PLA2G1B
	ACP1
	PDE4D
	CYP17A1
	CA2
	CNR1
	PTGS1
	RORC
	TOP1
	FFAR1
	AR
	MCL1
	TRPV1
	TOP2A
	HSD11B2
	HSD17B2
	CA7
	CA12
	CA14
	PTGIR
	CD81
	ALOX5
	HMGCR
	MGLL
	SERPINA6
	CYP51A1
	NR3C1
	PGR
	BCL2
	PREP
	HRH3
	HRH4
	CDC7
	LTB4R
	ALOX5AP
	AKR1C1
	PTGDR2
	CDC25B
	HTR2B
	HTR2A
	HTR2C
	RARG
	RARB
	RARA
	RXRA
	RXRG
	PIK3CG
	PI4KB
	PI4KA
	PIK3CA
	CDC25A
	NPC1L1
	CRHR1
	NR3C2
	PSEN2 PSENEN NCSTN APH1A PSEN1 APH1B
	ROCK2 ROCK1
	ITK
	NLRP3
	PORCN
	EPHX1
	PFKFB3
	KDR
	PDE7A
	STS
	CA1
	KIF11
	CHUK
	MAPKAPK2
	SSTR4
	HDAC6
	JAK2
	ROCK2
	HDAC8
	KDM4A
	KDM4C
	CSF1R
	HDAC2
	GRM5
BX05	ALOX5
	HTR1A
	HSD17B1
	ERN1
	PRKCZ
	MPEG1
	MMP13
	MMP3
	MMP7
	PCNA
	MMP9
	LTA4H
	AR
	KDR
	RORC
	PDE5A
	PDE3A
	PDE3B
	PIM1
	ADAM17
	ANPEP
	MIF
	EPHX2
	ELANE
	CDK5R1 CDK5
	GRIA1
	MAPK14
	CHEK1
	PRF1
	WEE1
	VCP
	MMP8
	SRC
	NCOR2 HDAC3
	HDAC11
	HRH4
	HDAC10
	TRPM8
	MMP16
	MMP14
	MMP12
	KDM4A
	KDM4C
	PBRM1
	ALDH2
	PDE2A
	SMARCA4
	TTR
	DYRK1A
	CLK1
	BRAF
	DYRK1B
	HDAC5
	NOX4
	NOX1
	ABL1
	MME
	MTOR
	PIK3CD
	PRKDC
	HCK
	PIK3CG
	PIK3CA
	GRM2
	CHRNA7
	PARP1
	CYP2C19
	ROCK2
	AKR1B1
	CDK2
	SLC1A3
	PIK3CB
	PI4KB
	CDK4
	PTK2
	CLK4
	CLK2
	GPBAR1
	PDGFRB
	PDGFRA PDGFRB
	CLK3
	PDK1
	SMARCA2
	ALK
	FGFR1
	ESR1
	LPL
	LIPC
	JAK3
	ADRA1D
	CYP3A4
	PLA2G7
	CYP17A1
	LIPE
	SLC27A4
	SREBF2
	PRKCA
	PLK1
	CDK1
	AKR1B10
BX06	KDM4E
	XDH
	ALOX15
	CDK1
	ALOX12
	GRK6
	CYP19A1
	HSD17B1
	ABCB1
	CA7
	CA12
	CA4
	CYP1B1
	AKR1B1
	CDK5R1 CDK5
	CA2
	CCNB3 CDK1 CCNB1 CCNB2
	CDK6
	CA1
	CA9
	ABCG2
	CBR1
	ESR2
	ESR1
	PTGS2
	ACHE
	ADORA1
	ADORA2A
	PTPRS
	AMY1A
	FLT3
	IKBKB
	NTRK2
	AR
	TTR
	NOX4
	MAOA
	SYK
	GSK3B
	ABCC1
	CSNK2A1
	CFTR
	AKR1B10
	TNKS2
	TNKS
	HSD17B2
	TERT
	BCHE
	ADORA3
	LCK
	PFKFB3
	PIM1
	PARP1
	ALOX5
	CALM1
	APP
	NOS2
	ARG1
	GLO1
	MMP9
	MMP2
	MMP12
	CD38
	TOP1
	EGFR
	SRC
	NAE1
	TYR
	AHR
	ESRRA
	CYP1A1
	KIT
	OPRD1
	AURKB
	MAPT
	TOP2A
	INSR
	MYLK
	APEX1
	PIK3CG
	IGF1R
	GPR35
	PTPN1
	KDR
	PLK1
	MET
	ALK
	AXL
	ST6GAL1
	SLC22A12
	FYN
	TACR2
	PRKDC
	MAPK3
	BACE1
	SIRT1
	CA6
	PLA2G2A
	PLA2G4A
	CXCR1
BX07	AKR1B1
	ADORA1
	TNF
	IL2
	XDH
	PTGS2
	RPS6KA3
	EGFR
	ACHE
	NQO2
	NMUR2
	ADRA2A
	ADRA2C
	NOX4
	ALDH2
	FDFT1
	CA2
	CA12
	MAPK14
	HPRT1
	ASNS
	NEU2
	CA13
	IMPDH2
	CD38
	POLA1
	P2RY1
	POLB
	POLG
	EGLN1
	CA1
	CA9
	ALOX5
	MGAM
	FPGS
	ITPR1
	POLD1
	MAG
	HK2
	HK1
	FGF2
	KDM5A
	KCNA3
	AMY2A
	CASP3
	NEU4
	KDM4D
	KDM4C
	SELP
	GAA
	P2RY4
	YARS
	P2RY2
	P2RY6
	FOLH1
	MMP16
	MMP1
	MMP14
	MMP8
	FOLR1
	GART
	EIF4E
	ABCB1
	TYMS
	F10
	PTPN22
	ADCY10
	PIK3CA
	SLC29A1
	CASP6
	CASP7
	CASP8
	CASP1
	CASP2
	SQLE
	DOT1L
	LGALS3
	ANPEP
	DHFR
	NAALAD2
	LAP3
	CMA1
	ERAP2
	ERAP1
	P2RY11
	CA7
	CA4
	NPC1L1
	PYGM
	CAPN1
	HDAC3
	HDAC6
	HDAC2
	HDAC1
	ENPEP
	SIGMAR1
	DRD2
	ITGB1 ITGA4
	ADAMTS5
	NEU3
BX08	AR
	HMGCR
	CYP51A1
	NPC1L1
	NR1H3
	CYP19A1
	CYP17A1
	RORC
	ESR1
	ESR2
	SREBF2
	SHBG
	SLC6A2
	CYP2C19
	RORA
	PTPN1
	BCHE
	SERPINA6
	SLC6A4
	CHRM2
	VDR
	ACHE
	G6PD
	NR1H2
	GLRA1
	CES2
	PTGER1
	PTGER2
	HSD11B1
	PTGES
	CDC25A
	PPARA
	PPARD
	DHCR7
	SQLE
	PTPN6
	NR1I3
	FDFT1
	SIGMAR1
	NOS2
	NR3C1
	PPARG
	CDC25B
	UGT2B7
	HSD11B2
	POLB
	PREP
	PTGER4
	IDO1
	DRD2
	TBXAS1
	ATP12A
	MDM4
	MDM2
	PTGIR
	DHCR7 EBP
	FABP4
	TERT
	FABP3
	FABP5
	FABP1
	ADORA3
	MAPK3
	PTPN11
	AKR1B10
	PRKCG
	PRKCD
	PRKCB
	PRKCE
	PRKCQ
	PTPRF
	PLA2G1B
	ACP1
	IGF1R
	SRC
	KDR
	ALK
	SCD
	MGLL
	BACE1
	CCR1
	TOP2A
	GABBR1
	BACE2
	MAPK14
	F11
	PTGFR
	PTGER3
	PTGDR
	TOP1
	HIF1A
	ACACB
	PRKCH
	PTPN2
	TACR1
	MTNR1A
	MTNR1B
	NPY5R
	SLC22A6
	MAP3K14
BX09	CA2
	CA7
	CA1
	CA6
	CA12
	CA14
	CA9
	CA5A
	CA5B
	MAOB
	AKR1B1
	ALOX5
	MMP9
	MMP1
	MMP2
	PTPN1
	CA13
	CA3
	APP
	NFE2L2
	STAT3
	HSD11B1
	ESR2
	CA4
	TLR4
	MET
	CYP1A1
	CYP1A2
	NQO2
	CYP1B1
	PTGS1
	CPA1
	EGFR
	TTR
	KDM4E
	KDM3A
	KDM6B
	FTO
	KDM4A
	KDM4C
	PTGS2
	TUBB1
	RELA
	SLC16A1
	TLR9
	FYN
	LCK
	AKR1B10
	ALOX15
	PRKCE
	F3
	NOS2
	NGFR
	CCND1 CDK4
	TUBB3
	ABCB1
	FBP1
	ACE
	REN
	TOP2A
	GLO1
	KDM2A
	TPMT
	MAOA
	BACE1
	AHR
	F2
	CTNNB1
	PARP1
	SLC13A5
	IKBKG IKBKB CHUK
	AMPD3
	ECE1
	KMO
	MME
	ITGAL ICAM1 ITGB2
	PTGDR2
	MAPK8
	SLC6A2
	AKR1C4
	OGA
	MIF
	DTYMK
	AKR1C3
	PTPN2
	DYRK1B
	ADA
	ACLY
	DAO
	GSK3B
	PYGL
	PYGM
	ALPL
	EDNRA
	MAPT
	NOX4
	ABCG2
	AKR1C2
	FOLH1
	PTGES
BX10	PPARG
	PPARA
	PPARD
	FABP4
	FFAR1
	PTGS1
	FABP3
	FABP5
	SCD
	FAAH
	TERT
	FABP1
	CNR1
	PTPN1
	PTPN2
	ALOX5
	PTGES
	LTB4R
	POLB
	PTPN6
	ESR2
	HSD11B1
	CES2
	RORC
	TOP1
	PTGER2
	ALOX12
	CDC25A
	PTGS2
	PTGIR
	NOS2
	PGR
	PDE4D
	SRD5A2
	PTPRF
	PTGER1
	PLA2G1B
	SLC22A12
	ESR1
	HMGCR
	CDC25B
	NR3C1
	NR1H3
	TRPV1
	ADORA3
	CD81
	PRKCH
	PTGDR2
	RXRB
	FNTA FNTB
	PTPN11
	SERPINA6
	SHBG
	G6PD
	CYP51A1
	HSD11B2
	PTGER4
	ACP1
	ITGAL ICAM1 ITGB2
	AKR1B10
	SLC16A1
	NPC1L1
	CYP17A1
	NR3C2
	IMPDH2
	CYP26B1
	CYP26A1
	CMA1
	CTSG
	FFAR4
	IL6
	GLUL
	PSEN2 PSENEN NCSTN APH1A PSEN1 APH1B
	HTR2B
	ADRA2B
	MAPK14
	MAPK1
	PLA2G4A
	PREP
	GRM2
	AR
	ENPP2
	EDNRA
	MDM2
	HNF4A
	DAGLA
	MAPK3
	RORB
	RBP4
	OXER1
	EPHX1
	TRPM8
	BCHE
	PRKAG1 PRKAB1 PRKAA2
	ALOX15
	TOP2A
	THRA
	THRB
	GCGR
	MMP2
BX11	AR
	NPC1L1
	HMGCR
	CYP51A1
	CYP19A1
	NR1H3
	CYP17A1
	RORC
	ESR1
	ESR2
	SHBG
	SREBF2
	ACHE
	CYP2C19
	PTPN1
	SLC6A2
	BCHE
	RORA
	SERPINA6
	SLC6A4
[truncated: 31,723 more rows]
